# Hypermethylation of the *HIC1* promoter and aberrant expression of *HIC1/SIRT1* contribute to the development of thyroid papillary carcinoma

Wenyi Wu<sup>1,\*</sup>, Liting Zhang<sup>2,\*</sup>, Jianqing Lin<sup>1</sup>, Hanwei Huang<sup>3</sup>, Bai Shi<sup>1</sup>, Xingong Lin<sup>1</sup>, Zhongxin Huang<sup>1</sup>, Chaoyang Wang<sup>1</sup>, Jianlong Qiu<sup>4</sup>, Xiaolong Wei<sup>5</sup>

<sup>1</sup>Department of general surgery, The Second Affiliated Hospital of Fujian Medical University, Quanzhou, Fujian, China

<sup>2</sup>Endocrine Department, The 180th Military Hospital of Chinese Peoples, Liberation Army, Quanzhou, Fujian, China

<sup>3</sup>Endocrine Department, Affiliated Zhongshan Hospital of Guangdong Medical College, Zhongshan, Guangdong, China

<sup>4</sup>Department of Pathology, The Second Affiliated Hospital of Fujian Medical University, Quanzhou, Fujian, China

<sup>5</sup>Department of Pathology, Cancer Hospital of Shantou University Medical College, Shantou, Guangdong, China

\*These authors contributed equally to this work

**Correspondence to:** Xiaolong Wei, **email:** weixiaolonghh@126.com  
Wenyi Wu, **email:** wwyii8522858@163.com

**Keywords:** *HIC1*, *SIRT1*, papillary thyroid carcinoma, promoter hypermethylation

**Received:** April 21, 2016

**Accepted:** October 21, 2016

**Published:** October 26, 2016

## ABSTRACT

Hypermethylation leading to the loss of hypermethylated in cancer-1 (*HIC1*) gene expression occurs in many different types of human cancer. *HIC1* is a transcriptional repressor that directly binds to the promoter region of NAD-dependent deacetylase sirtuin-1 (*SIRT1*). *SIRT1* functions in cell growth, is anti-apoptotic, protect neurons, functions in senescence, and regulates energy restriction. Epigenetic modification and dysregulation affecting the *HIC1/SIRT1* axis is potentially important for the development of malignancies. However, the importance of *HIC1* expression in the development of papillary thyroid carcinoma, especially in Chinese patients, is uncertain. Therefore, we assessed the level of methylation in the *HIC1* promoter and the mRNA and protein expression levels of *HIC1* and *SIRT1* in human thyroid papillary carcinoma and tumor adjacent control tissues. The demethylation reagent 5-aza-2'-deoxycytidine (5-aza-dc) and an *HIC1* overexpression plasmid were used to manipulate the *HIC1/SIRT1* pathway, and the effects on cell senescence, apoptosis, and cell cycle progression were assessed. Compared to normal thyroid tissue, thyroid tumors had lower expression of *HIC1* and higher *SIRT1* expression. The level of *HIC1* methylation was also higher in thyroid carcinoma tissues than adjacent tissues. *HIC1* expression was closely correlated with patient age and tumor progression. Restoration of *HIC1* expression through an overexpression plasmid or 5-aza-dC treatment reduced *SIRT1* expression and cell proliferation, and led to senescence, cell cycle arrest, and apoptosis. Aberrant expression of *HIC1/SIRT1* and hypermethylation of the *HIC1* promoter may be critical for the development and progression of papillary thyroid cancer.

## INTRODUCTION

Thyroid cancer originating from the thyroid epithelial cells is the most common endocrine malignancy. The incidence of thyroid cancer in the general population has gradually increased, and papillary thyroid carcinoma, which accounts for 80–85% of thyroid malignancies, is

the most common form of thyroid cancer [1, 2]. While the etiology of thyroid cancers remains somewhat unclear, it is likely related to the interplay of environmental and genetic factors such as tumor suppressor gene promoter methylation.

Epigenetic gene silencing can disrupt the function of tumor suppressor genes, thereby promoting the activation

of oncogenic genetic mutations [3]. Hypermethylated in cancer-1 (*HIC1*), a tumor suppressor gene essential to mammalian development [4], is located in the chromosomal regions 17p13.3, and is telomeric to the TP53. In many different human cancers (including prostate [5–7], hepatocellular [8, 9], pancreatic [10], renal cell carcinoma [11], breast cancers [12] and esophageal cancers [13], *HIC1* is epigenetically inactivated but not mutated [14]. The methylation status of the *HIC1* promoter is also associated with tumorigenesis and poor survival in patients with medulloblastomas [15]. In a pancreatic cancer model, restoration of *HIC1* function can be accomplished by forced suppression by demethylation of the promoter and prevents cancer cell formation and reduces the aggressiveness of the tumors [10]. *HIC1* binds to the deacetylase that regulates expression of NAD-dependent deacetylase sirtuin-1 (*SIRT1*), forming a transcriptional repression complex, which subsequently binds to the *SIRT1* promoter and suppresses its transcription [16, 17]. *SIRT-1* is a protomember of the sirtuin family [18] and is known to function in cell growth, be anti-apoptotic, protect neurons, function in senescence, and regulate energy restriction [19, 20]. Inactivation of *HIC1* upregulates *SIRT1* expression in both cancerous and normal cells and promotes tumorigenesis [16, 21]. Recent studies indicate that *HIC1* methylation causes abnormal overexpression of *SIRT*, which contributes to the development and progression of breast [16], lung [17], and pancreatic cancers [10].

In papillary thyroid carcinoma, the methylation and expression patterns of *HIC1* have not yet been described and it is unclear whether the *HIC1/SIRT1* pathway is involved in the development and progression of disease. Therefore, we investigated the methylation patterns of the *HIC1* promoter in primary samples from thyroid papillary carcinoma tumors and tissue adjacent to the tumors. We hypothesized that *HIC1* promoter methylation would cause abnormal expression of *HIC1/SIRT1*, thereby enhancing the development and progression of papillary thyroid carcinoma.

## RESULTS

### Expression of *HIC1* and *SIRT1* in thyroid carcinomas and normal thyroid tissues

The mRNA expression levels of *HIC1* and *SIRT1* were measured in samples from thyroid carcinomas and adjacent normal thyroid tissues. The relative *HIC1* mRNA expression was significantly lower in papillary thyroid carcinomas ( $0.47 \pm 0.07$ ) than in the paired normal thyroid tissues ( $2.12 \pm 0.10$ ). Similarly, the relative *SIRT1* mRNA expression in papillary thyroid carcinomas ( $2.27 \pm 0.12$ ) was significantly higher than in the paired normal thyroid tissues ( $0.32 \pm 0.06$ ) (Figure 1A). A negative correlation

between the mRNA expression levels of *HIC1* and *SIRT1* was observed in the papillary thyroid carcinomas (Figure 1B). The protein expression levels of *HIC1* and *SIRT1* were measured by immunohistochemistry. In normal thyroid tissues, *HIC1* was expressed in both the nuclei and the cytoplasm of normal thyroid tissues, although nuclear expression was dominant. In the papillary thyroid carcinoma tissues, *HIC1* expression was relatively low compared to the paired normal thyroid tissue and only expressed in the nucleus (Figure 1C). Immunohistochemical analysis of *SIRT1* expression confirmed low levels of nuclear protein in normal thyroid tissues, and staining in both the nucleus (dominant) and cytoplasm in papillary thyroid carcinomas. The expression level of nuclear *SIRT1* in papillary thyroid carcinomas was significantly greater than the adjacent normal thyroid tissues (Figure 1C). Statistical analysis confirmed that *HIC1* expression in primary papillary thyroid carcinomas was significantly correlated with lymph node metastasis of thyroid cancer, age, and TNM staging, but not with sex, tumor size, or tumor capsular invasion (Table 1).

Significant differences were observed in the levels of *HIC1* and *SIRT1* protein expression by Western blot analysis in the thyroid cancer tissues and adjacent normal tissues. *HIC1* protein expression in the papillary thyroid carcinomas ( $0.42 \pm 0.07$ ) was lower than in the adjacent normal tissues ( $0.94 \pm 0.11$ ;  $p < 0.01$ ) and the inverse was true for *SIRT1* protein expression (Figure 1D–1E). Consistent with the mRNA results, there was also a negative correlation between *HIC1* and *SIRT1* protein expression in the papillary thyroid carcinomas (Figures 1F,  $p < 0.05$ ).

### Hypermethylation of the *HIC1* gene in thyroid cancer

To assess the hypermethylation status of the *HIC1* promoter, a Bisulfite Genomic Sequencing (BGS) assay was performed. The positions of the BGS primers within the *HIC1* promoter are shown in Figure 2A. *HIC1* gene measurements in thyroid cancer and adjacent normal tissues were performed. *HIC1* cloning and sequencing confirmed the presence of more methylated CpG islands in the papillary thyroid carcinomas (61.3%) than the adjacent normal thyroid tissues (41.7%;  $p < 0.01$ , Figure 2B). Within the papillary carcinoma samples, there were also negative correlations between the amount of *HIC1* methylation and *HIC1* mRNA expression (Figure 2C,  $p < 0.05$ ), and between *HIC1* methylation and *HIC1* protein expression (Figure 2D,  $p < 0.05$ ). Consistent with the *HIC1* immunohistochemistry data, the frequency of *HIC1* methylation in patients with lymph node metastasis was significantly higher than for patients without lymph node metastasis and for patients over 45 years-of-age (Table 2).

## HIC1 hypermethylation promoted SIRT1 expression in TPC-1 cells

Tissue analyses confirmed that the level of HIC1 expression in thyroid carcinoma tissue was greater than in normal tissue, and that within thyroid carcinomas there was a negative correlation between HIC1 and SIRT1 expression. Therefore, we hypothesized that silencing HIC1 would downregulate its expression, thereby upregulating SIRT1 expression. TPC-1 cells were treated with the demethylating agent 5-aza-dC and BGS amplification was used to measure methylation in the *HIC1* gene promoter. The TPC-1 cells treated with 5-aza-dC (TPC + 5-aza-dC, 37.5%) had significantly less methylation than untreated TPC-1 cells (TPC-1, 62.5%) and control TPC-1 cells treated with PBS (TPC-1 + PBS, 65.0%; Figure 3A,  $p < 0.05$ ). RT-qPCR quantification

confirmed that the TPC-1 + 5-azadC condition had the highest expression of HIC1 mRNA (Figure 3B,  $p < 0.05$ ) and protein (Figure 3D–3E,  $p < 0.05$ ), and the least SIRT1 mRNA and protein expression (Figure 3B and 3C,  $p < 0.05$ ). These results demonstrated that reversing the *HIC1* promoter methylation upregulated *HIC1* expression and indirectly downregulated SIRT-1 expression, suggesting that in patients epigenetic changes in *HIC1* may affect HIC1/SIRT1 protein expression.

## Assessing the effects of 5-aza-dC treatment on cell cycle, apoptosis, cell senescence, and proliferation in TPC-1 cells

A similar number of TPC-1 ( $61.44 \pm 1.12\%$ ) and TPC-1 + PBS ( $61.50 \pm 1.51\%$ ) cells were in the G1 phase of the cell cycle. Treatment with 5-aza-dC ( $69.92 \pm 1.31\%$ )

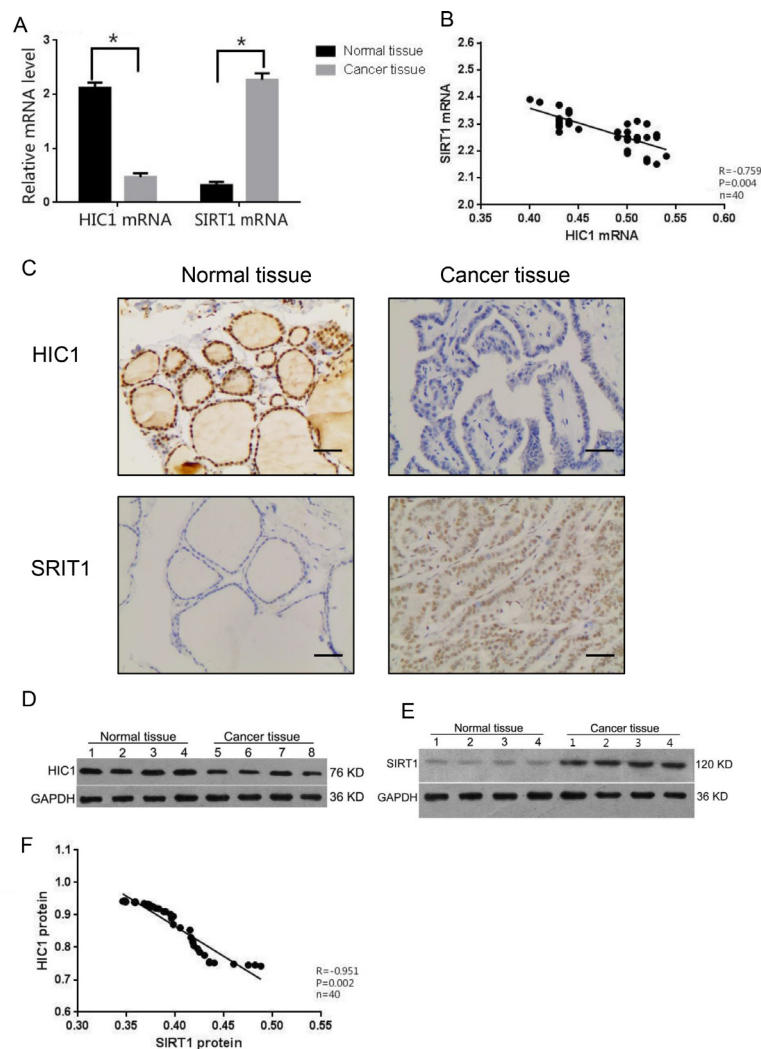

**Figure 1: Expression HIC1 and SIRT1 in papillary thyroid cancer tissue.** The mRNA and protein levels of HIC1 and SIRT1 were assessed in papillary thyroid cancer tissues and adjacent histologically normal tissue ( $n = 40$  each) by qRT-PCR (A–B), immunohistochemistry, (Original magnification, 200 $\times$ ) Scale bar = 50  $\mu$ m (C), and Western blot (D–F). Western blot was used to detect HIC1, SIRT1, and GAPHD expression.  $*p < 0.05$  compared with noncancerous tissue with the Student's  $t$ -test. Pearson correlation analysis was used for panels B and F.

**Table 1: Patient characteristics stratified by HIC1 expression in human papillary thyroid cancer tissues**

| Clinical feature      | n  | HIC1 |    | P     |
|-----------------------|----|------|----|-------|
|                       |    | -    | +  |       |
| Lymph node metastasis |    |      |    |       |
| Yes                   | 18 | 14   | 4  | 0.038 |
| No                    | 22 | 10   | 12 |       |
| Sex                   |    |      |    |       |
| Male                  | 14 | 8    | 6  | 0.787 |
| Female                | 26 | 16   | 10 |       |
| Age (year)            |    |      |    |       |
| < 45                  | 25 | 12   | 13 | 0.046 |
| ≥ 45                  | 15 | 12   | 3  |       |
| Tumor size (cm)       |    |      |    |       |
| < 3                   | 24 | 14   | 10 | 0.792 |
| ≥ 3                   | 16 | 10   | 6  |       |
| TNM stage             |    |      |    |       |
| I-II                  | 28 | 12   | 16 | 0.018 |
| III-V                 | 12 | 10   | 2  |       |
| Capsule invasion      |    |      |    |       |
| Yes                   | 17 | 9    | 8  | 0.433 |
| No                    | 23 | 15   | 8  |       |

**Table 2: Correlations between HIC1 promoter methylation and patient characteristics**

| Clinical feature      | n  | HIC1                      |       |               |       |               |       |
|-----------------------|----|---------------------------|-------|---------------|-------|---------------|-------|
|                       |    | Methylation frequency (%) | P     | mRNA          | P     | protein       | P     |
| Lymph node metastasis |    |                           |       |               |       |               |       |
| Yes                   | 18 | 68.1 ± 3.3                | 0.001 | 0.100 ± 0.001 | 0.001 | 0.191 ± 0.031 | 0.001 |
| No                    | 22 | 56.4 ± 2.8                |       | 0.322 ± 0.043 |       | 0.601 ± 0.037 |       |
| Sex                   |    |                           |       |               |       |               |       |
| Male                  | 14 | 63.1 ± 2.6                | 0.089 | 0.233 ± 0.043 | 0.137 | 0.434 ± 0.072 | 0.320 |
| Female                | 26 | 60.9 ± 4.6                |       | 0.217 ± 0.019 |       | 0.408 ± 0.078 |       |
| Age (year)            |    |                           |       |               |       |               |       |
| < 45                  | 25 | 56.5 ± 3.7                | 0.001 | 0.302 ± 0.034 | 0.001 | 0.535 ± 0.097 | 0.001 |
| ≥ 45                  | 15 | 70.4 ± 4.1                |       | 0.092 ± 0.019 |       | 0.221 ± 0.007 |       |
| Tumor size (cm)       |    |                           |       |               |       |               |       |
| < 3                   | 24 | 61.1 ± 2.4                | 0.147 | 0.241 ± 0.025 | 0.080 | 0.442 ± 0.043 | 0.061 |
| ≥ 3                   | 16 | 62.5 ± 3.5                |       | 0.222 ± 0.042 |       | 0.480 ± 0.080 |       |
| TNM stage             |    |                           |       |               |       |               |       |
| I-II                  | 28 | 58.6 ± 2.1                | 0.001 | 0.274 ± 0.028 | 0.001 | 0.494 ± 0.051 | 0.001 |
| III-IV                | 12 | 68.9 ± 1.8                |       | 0.101 ± 0.010 |       | 0.237 ± 0.023 |       |
| Capsule invasion      |    |                           |       |               |       |               |       |
| Yes                   | 17 | 62.9 ± 2.9                | 0.136 | 0.213 ± 0.019 | 0.193 | 0.387 ± 0.077 | 0.064 |
| No                    | 23 | 60.7 ± 5.3                |       | 0.231 ± 0.053 |       | 0.439 ± 0.089 |       |

increased the number of cells in the G1 phase (Figure 4A,  $p < 0.05$ ) suggesting that 5-aza-dC induced demethylation of thyroid carcinoma cells arrested cells at the G1 phase. Annexin V-FITC/PI double staining confirmed a higher percentage of cells undergoing apoptosis in the TPC-1 + 5-aza-dC group ( $5.32 \pm 0.15\%$ ) compared to the TPC-1 ( $2.10 \pm 0.11\%$ ) and TPC-1 + PBS groups ( $2.15 \pm 0.08\%$ ) (Figure 4B,  $p < 0.05$ ). The lowest levels of senescence, measured as  $\beta$ -galactosidase staining, were detected in the TPC-1 group ( $27.52 \pm 2.23\%$ ). The TPC-1 + PBS group ( $30.22 \pm 3.42\%$ ) had a slightly greater percentage of senescent cells than the TPC-1 group. The TPC-1 + 5-aza-dC group ( $55.21 \pm 2.72\%$ ) had the most senescent cells, indicating that demethylation increased cellular aging in papillary thyroid carcinoma cells

(Figure 4C,  $p < 0.05$ ). Cell proliferation was measured daily and the TPC-1 + 5-aza-dC group proliferated less than the TPC-1 and TPC-1 + PBS groups (Figure 4D,  $p < 0.05$ ).

### Effects of forced HIC1 overexpression on SIRT1 expression, proliferation, cell cycle arrest, apoptosis, and cell senescence in TPC-1 Cells

We then measured expression of HIC1 and SIRT1 at the mRNA and protein levels after transfecting TPC-1 cells with the pcDNA3-FlagHIC1 plasmid (*HIC1* transfected group). Transfection with the plasmid increased HIC1 mRNA and protein expression compared to control TPC-1 cells (Figure 5A–5C,  $p < 0.05$ ). In

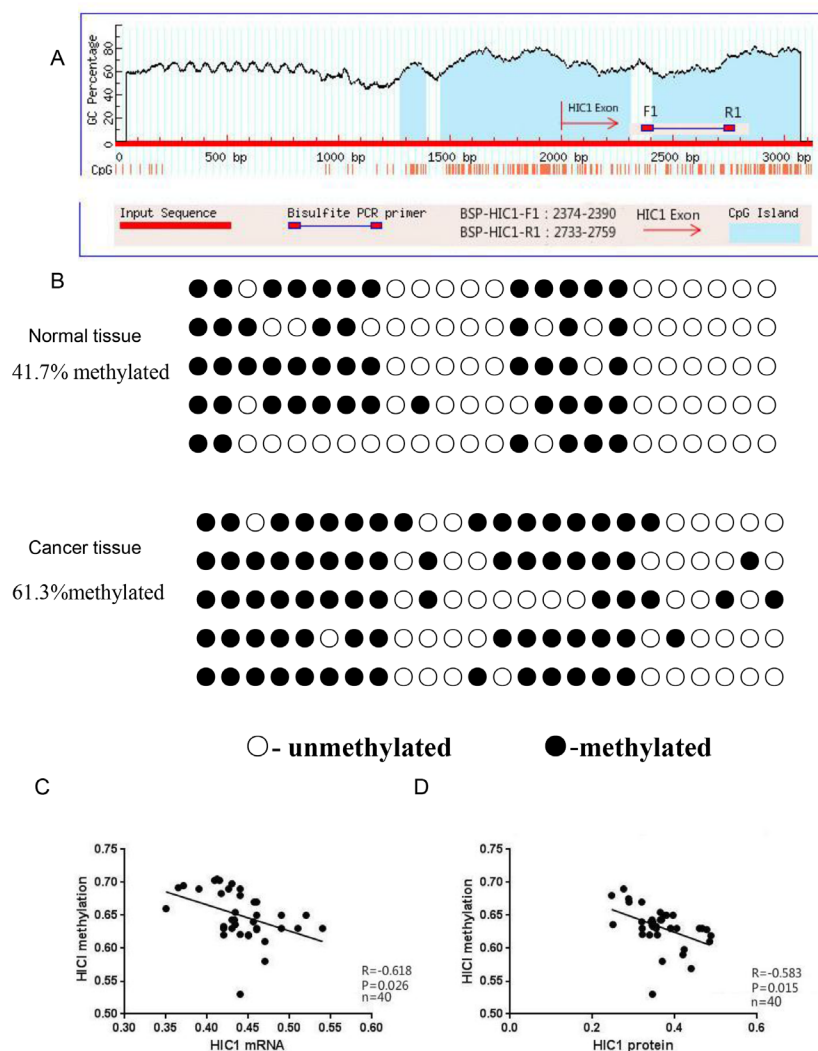

**Figure 2: Analysis of HIC1 promoter methylation, mRNA expression, and protein expression in papillary thyroid cancer tissue.** (A) The CpG islands and locations of the BGS primers in the promoter of *HIC1* are shown. BSP-HIC1-F1: BGS forward primer, BSP-HIC1-R1: BGS reverse primer. (B) BGS analysis of HIC1 promoter methylation in papillary thyroid cancer and matching adjacent noncancerous tissues ( $n = 40$ ). Methylated sites are shown as filled circles, unmethylated sites as empty circles, and deletion or mutation sites as filled triangles. The percentage shown indicates the total methylation rate. The association between the level of HIC1 promoter methylation and HIC1 mRNA (C) or protein (D) expression in papillary thyroid cancer tissues was evaluated using a Pearson correlation analysis.

addition, the SIRT1 mRNA and protein expression levels were lower in the *HIC1* transfected group than in untransfected cells (Figure 5A–5C,  $p < 0.05$ ), showing that increased expression of HIC1 downregulated expression of the *SIRT1* gene in TPC-1 cells.

Consistent with the results obtained using 5-aza-dC treatment, the number of cells in the G1 phase in the *HIC1* transfected group ( $69.86 \pm 1.22\%$ ) was slightly higher than in untransfected TPC-1 cells ( $62.36 \pm 1.45\%$ ) (Figure 5D,  $p < 0.05$ ). The levels of apoptosis ( $5.00 \pm 0.16\%$  vs  $1.99 \pm 0.11\%$ , Figure 5E,  $p < 0.05$ ) and  $\beta$ -galactosidase staining ( $60.32 \pm 1.51\%$  vs  $28.23 \pm 1.22\%$ , Figure 5F,

$p < 0.05$ ) were also greater in the HIC1 overexpressing cells than the control TPC-1 cells. Cell proliferation in the *HIC1* transfected group was significantly lower than in controls (Figure 5G,  $p < 0.05$ ).

## DISCUSSION

Previous studies have shown that hypermethylation of the HIC1 promoter and overexpression of HIC1 protein occurs in thyroid cancer cells [22]; but this is the first report that HIC1 promoter methylation in papillary thyroid carcinomas correlates with lymph node metastasis, tumor

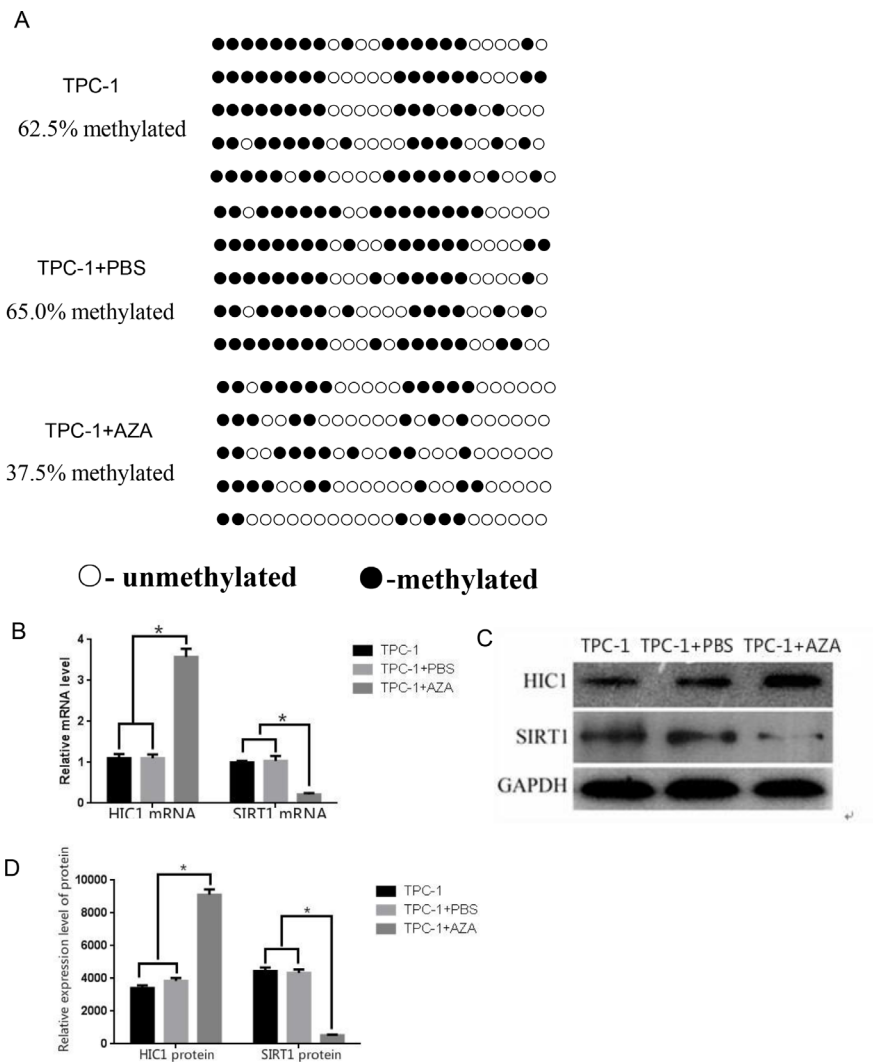

**Figure 3: Effects of 5-aza-dC treatment on HIC1 and SIRT1 expression in TPC-1 cells.** (A) *HIC1* promoter methylation was assessed in the presence and absence of the demethylating agent 5-aza-dC using BGS analysis in a human papillary thyroid cancer cell line (TPC-1 cells). Methylated sites are shown as filled circles, unmethylated sites as empty circles, and deletion or mutation sites as filled triangles. The percentage shown indicates the total methylation rate. (B) The mRNA expression levels of HIC1 and SIRT1 were assessed by qRT-PCR in TPC-1 cells treated with 5-aza-dC. \* $p < 0.05$  compared to untreated TPC-1 cells or TPC-1 cells + PBS using a Student's *t* test. (C) HIC1 and SIRT1 protein expression by Western blot (D) Quantification of HIC1 and SIRT1 protein expression in TPC-1 cells after 5-aza-dC administration ( $n = 3$ ). \* $p < 0.05$  compared untreated TPC-1 cells or TPC-1 cells + PBS using a Student's *t* test. GAPDH was used as an internal control.

stage, and patient age. *HIC1* demethylation and exogenous transfection of an *HIC1* expression plasmid upregulated *HIC1* expression, inhibited cell proliferation, induced cellular aging, and increased cell cycle arrest in a papillary thyroid cell line.

The *HIC1* gene is distal to the p53 tumor suppressor gene and encodes a transcriptional repressor [14, 23], whose target genes are associated with cell proliferation [24], tumor growth [25], angiogenesis [26], tumor invasion [24, 27] and the epithelial-mesenchymal transition [13]. The *HIC1* gene is widely expressed in normal tissues but its expression in primary tumors varies (e.g., prostate [5–7], breast [11] and head and neck squamous cell carcinoma [28]) and is silenced by hypermethylation. Consistent with our results, a study published by Zhao et al. demonstrated that hypermethylation of *HIC1* is an important factor for progression of pancreatic carcinoma [10]. The significantly higher levels of *HIC1* methylation in papillary thyroid carcinomas compared

to normal tissues suggests that excessive methylation is occurring in papillary thyroid carcinomas. Consistent with increased methylation, the levels of *HIC1* mRNA and protein expression in papillary thyroid carcinomas were significantly lower than in adjacent normal tissues. The negative correlation between *HIC1* methylation and the expression of *HIC1* mRNA and protein suggested that hypermethylation of the *HIC1* promoter inhibited *HIC1* expression, and may be associated with the development of papillary thyroid carcinoma.

Factors affecting the prognosis of papillary thyroid carcinoma include sex, age, tumor size, capsular invasion of the primary tumor, and metastasis to peripheral organs. We confirmed that patients with lymph node metastases had a higher frequency of *HIC1* methylation than patients without metastases. In addition, *HIC1* methylation frequency was significantly greater for patients older than 45 years-of-age and for those with higher TNM staging *HIC1* mRNA and protein expression in patients

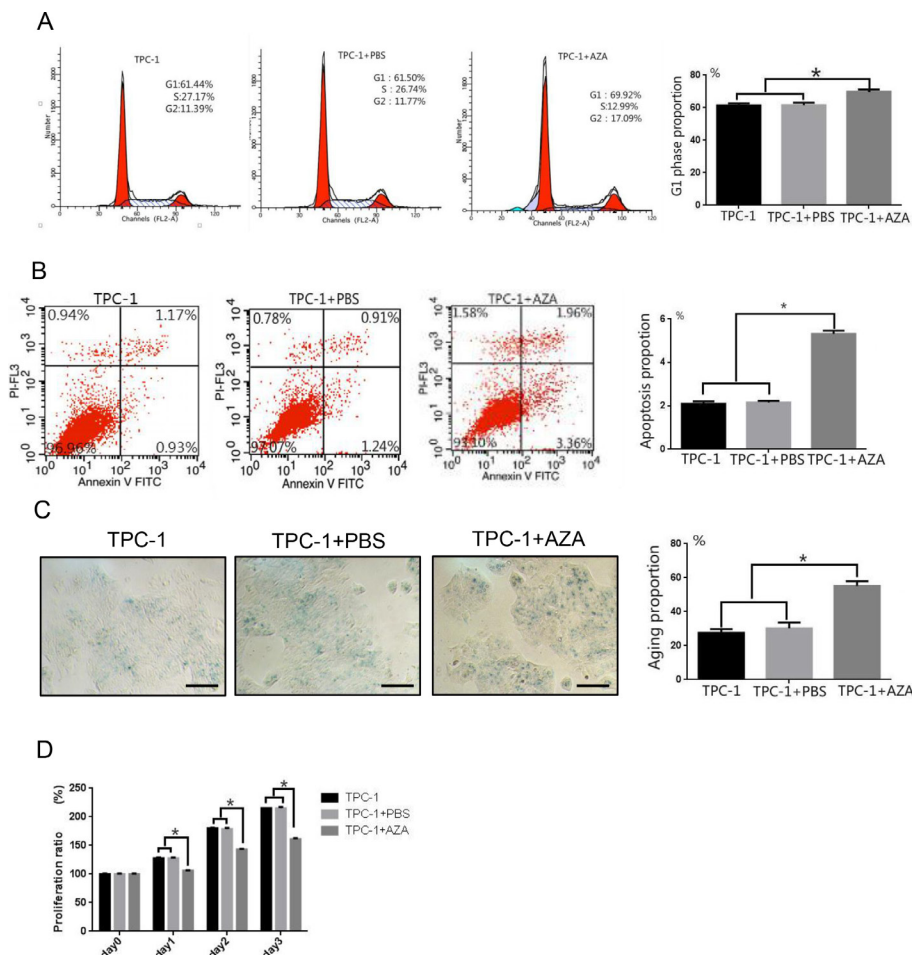

**Figure 4: Effects of 5-aza-dC treatment on cell cycle, apoptosis, senescence, and proliferation in TPC-1 cells. (A)** Flow cytometry confirmed cell cycle arrest at the G1 phase after treatment with 5-aza-dC in TPC-1 cells. **(B)** AnnexinV staining indicated a significantly greater percentage of TPC-1 cells undergoing apoptosis after treatment with 5-aza-dC. **(C)** 5-aza-dC significantly increased the number of senescent ( $\beta$ -galactosidase positive) TPC-1 cells (100 $\times$  magnification, Scale bar = 100  $\mu$ m). **(D)** TPC-1 cell growth was inhibited after 5-aza-dC treatment. \* $p < 0.05$  compared untreated TPC-1 cells or TPC-1 cells + PBS using a Student's  $t$  test.

with lymph node metastasis were significantly lower for those without lymph node metastasis and for patients younger than 45 years-of-age and for patients with higher TNM staging. Thus, *HIC1* methylation frequency and *HIC1* mRNA and protein expression in papillary thyroid carcinoma, is closely associated with prognosis.

SIRT1, which is a class III histone deacetylase, protects cellular longevity in periods of oxidative stress and DNA damage, and is under the direct transcriptional control of *HIC1* [16, 17]. *HIC1* directly binds to the SIRT1 promoter and represses its transcription; thus the loss of *HIC1* leads to the accumulation of SIRT1 [16, 17]. Studies

indicate that SIRT1 is overexpressed in various human malignancies such as breast [29] and prostate cancers [30]. Consistent with these studies, we found higher levels of SIRT1 mRNA and protein expression in papillary thyroid carcinomas than in the adjacent normal thyroid tissues. Notably, there was also a negative correlation between *HIC1* and SIRT1 expression. In papillary thyroid carcinoma, it is likely that reduced expression of the *HIC1* gene contributes to upregulation of SIRT1 expression. We also found that forced demethylation of the *HIC1* promoter using 5-aza-dC or overexpression of *HIC1* suppressed expression of SIRT1. Inhibition of SIRT

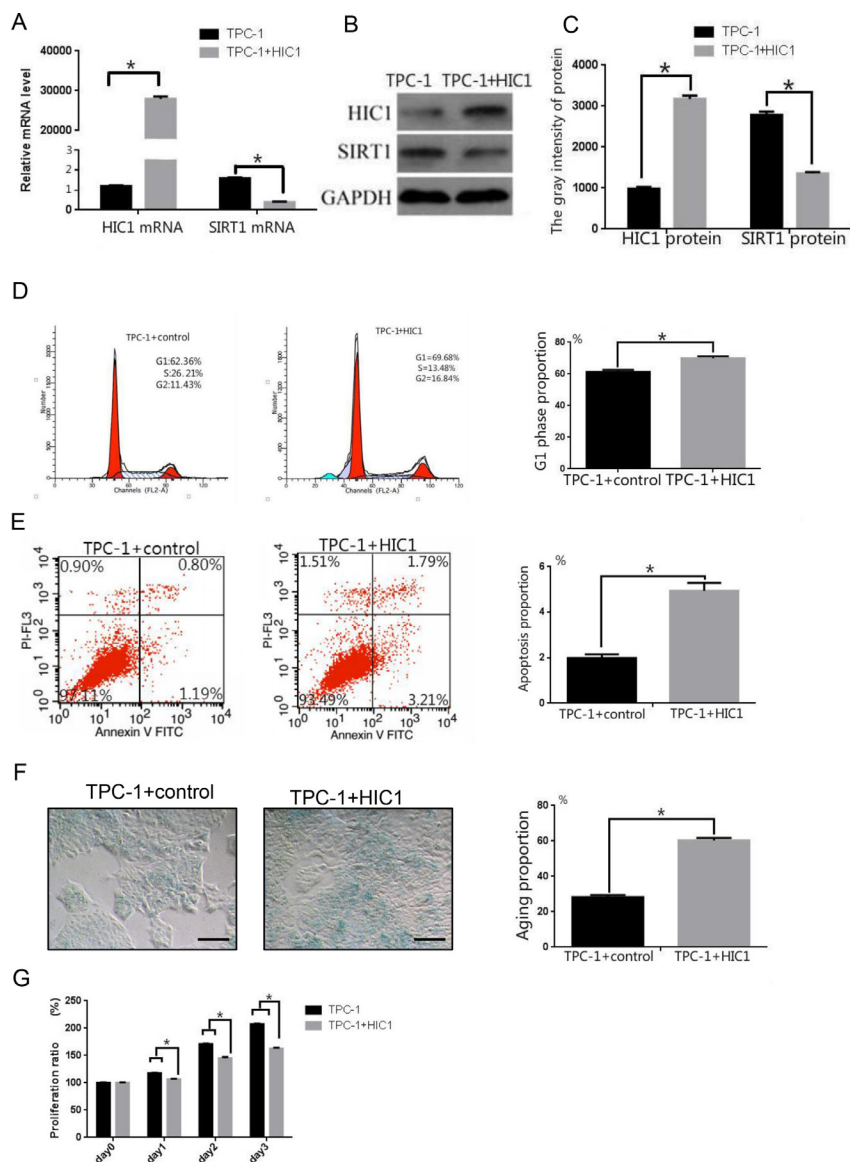

**Figure 5: Effects of overexpression of pcDNA3.1(+)-flag-HIC1 on TPC-1 cells.** (A) qRT-PCR analysis of *HIC1* and SIRT1 mRNA expression levels in TPC-1 cells after transfection with an *HIC1* overexpression plasmid. (B–C) *HIC1* and SIRT1 protein expression levels were determined in TPC-1 cells by Western blot ( $n = 3$ ). GAPDH was used as an internal control. Flow cytometry was used to confirm that TPC-1 cells transfected with pcDNA3.1(+)-flag-HIC1 were arrested in the G1 phase (D) and that apoptosis was induced (E). (F)  $\beta$ -galactosidase staining showed that transfection with pcDNA3.1(+)-flag-HIC1 induced cellular senescence. Scale bar = 100  $\mu$ m. (G) Growth of TPC-1 transfected with pcDNA3.1(+)-flag-HIC1 was inhibited. \* $p < 0.05$  compared to the TPC-1 group transfected with control plasmid using a Student's  $t$  test.



expression was associated with inhibited proliferation and the induction of cellular aging and cell cycle arrest. These findings indicated that *HIC1* methylation regulated the HIC1/SIRT1 signaling pathway and was involved in the development of papillary thyroid carcinomas.

In summary, hypermethylation of the *HIC1* promoter in thyroid papillary carcinoma might contribute to aberrant expression of HIC1/SIRT1, which in turn promotes thyroid cancer. Hypermethylation of the *HIC1* promoter and aberrant expression of HIC/SIRT1 may be useful for assessing the risk of developing thyroid papillary carcinoma and may be a novel therapeutic target.

## MATERIALS AND METHODS

### Tissue specimens

All tissue specimens were surgically collected from the Department of General Surgery, the Second Affiliated Hospital, Fujian Medical University in Fujian, China from March 2013 to March 2014. This study was approved by the Ethics Committee of the Second Affiliated Hospital of Fujian Medical University, and was performed in accordance with the ethical standards laid down in the 1964 declaration of Helsinki and all subsequent revisions. All of the patients enrolled in the study provided informed consent prior to their inclusion in the study. Papillary thyroid carcinomas ( $N = 40$ ) and matching normal (confirmed histologically by a pathologist) thyroid tissues from the opposite lobe were collected from the same patient. TNM staging of the thyroid tumors was performed according to the 2012 Guidelines of the Union for International Cancer Control (UICC) and the American Joint Committee on Cancer (AJCC). Post-operative tumor specimens were histopathologically confirmed as papillary thyroid carcinomas. All patients had normal preoperative thyroid function and complete clinical and pathological data. None of the patients received preoperative chemotherapy or radiotherapy. Tumor specimens were divided into three equal portions for histopathological examination, Western blot analysis after preservation at  $-80^{\circ}\text{C}$ , and real-time fluorescent-based quantitative PCR (RT-qPCR) and quantification of methylated CpG islands after preservation in RNAlater at  $4^{\circ}\text{C}$ .

### RNA isolation and RT-PCR analysis

TRIzol (Invitrogen, Carlsbad, CA) was used to isolate total RNA from cultured cells or flash-frozen thyroid tissues. The RevertAid H Minus First Strand cDNA Synthesis Kit (MBI, Canada) with random primers was used to synthesize the cDNA. PCR reactions involved  $0.5\ \mu\text{L}$  of cDNA and the ABI PRISM 7500 Sequence Detection System (Applied Biosystems, Foster City, CA, USA).

*Homo sapiens* 18 S ribosomal RNA (18 s rRNA) gene was used as internal reference gene (GenBank Accession No.: NR\_003286). The primer sequences utilized were: 18 s rRNA forward primer: CCTGGATACCGCAGCTAGGA and 18s rRNA reverse primer: GCGGCGCA-ATACGAATGCCCC; *HIC1* forward primer: CCCGGGACTGATAATGTGA and *HIC1* reverse primer: AGACCTGGTGGTAGGCTCTT; and *SIRT1* forward primer: ACTTCAGGT- CAAGGGATGG and *SIRT1* reverse primer: GTTCTGGGTATAGTTGCCAAG. Relative quantification of each gene was calculated using the formula:  $C_T = (C_{T,Target} - C_{T,18srRNA})_{Time\ x} - (C_{T,Target} - C_{T,18srRNA})_{Time\ 0}$ . RQ value =  $2^{-C_T}$ . T.target represents target gene (*HIC1* or *SIRT1*); T.18s rRNA represents internal reference gene (18 s rRNA); Time  $x$  represents pathological specimen; and Time 0 represents tumor-adjacent normal tissue. The RQ value is the relative expression level of the target gene to the reference gene.

### Immunohistochemistry

To evaluate *HIC1* and *SIT1* protein expression, immunohistochemistry was performed on  $4\ \mu\text{M}$ -thick tissue sections from the thyroid papillary carcinomas and paired adjacent normal tissues as previously described [31]. Sections were incubated with a primary antibody against *HIC1* (1:100) or *SIRT1* (1:150) at  $4^{\circ}\text{C}$  overnight and incubated with horseradish peroxidase-conjugated goat anti-mouse/rabbit IgG antibody (ZSGB-Bio, Beijing, China) followed by 3, 3'-diaminobenzidine tetra-hydrochloride (DAB) staining. To quantify the level of nuclear *HIC1* or *SIRT1* staining, the percent of stained cells were scored as: 0 = no staining; 1 = 1–25% of nuclei stained; 2 = 25–50% of nuclei stained; and 3 = > 50% of nuclei stained. Samples scoring 0–1 were considered negative and samples staining 2–3 were considered positive.

### DNA extraction and bisulfite genomic sequencing

Tissue or cellular genomic DNA was extracted using the Promega wizard genomic DNA purification kit, and then used as a template for the BGS assay using the QIAGEN EpiTect Bisulfite Kit following the manufacturer's protocol. The sequences of the *HIC1* upstream and downstream PCR primers were designed using MethPrimer (<http://www.urogene.org/methprimer/>) and were: 5'-CGTTAGGGTTGCGGGAA-3' and 5'-GCCCTCCCACCTATACCACCTAAAA-3' respectively. The BSP-*HIC1* sequence fragment size was 386 bp (including 24 CG sites). The PCR reaction conditions were: a denaturing step at  $95^{\circ}\text{C}$  for 5 min, followed by 40 cycles of  $95^{\circ}\text{C}$  for 15 s and  $60^{\circ}\text{C}$  for 15 s, and finally extension at  $72^{\circ}\text{C}$  for 8 min. PCR products were separated using agarose gel electrophoresis, purified with a QIAquick gel extraction kit (Qiagen, Valencia, CA,

USA) and then cloned into a vector for sequencing. The methylation status of HIC1 was quantified by counting the number of methylated CpG sites in all the clones and the percentage of methylated CpG sites was determined from all of the CpG sites.

### 5-aza-dC treatment

The TPC-1 cell line was obtained from the Institute of Interdisciplinary Research (IRIBHM) (Brussels, Belgium) and maintained in RPMI-1640 medium (Gibco, Paisley, Scotland, UK) supplemented with 10% bovine calf serum (Gibco). As described in previously [10], the cells were incubated in culture medium with 5-aza-dC (1  $\mu\text{g}/\text{mL}$ ) for 4 days to assess cell senescence, cell cycle and apoptosis, and 5 days to measure cell proliferation. The culture medium was changed on days 1 and 3. PBS was used as control. Cells were collected at the end of the fourth day for genomic DNA and protein extraction.

### Transfection

pCDNA3.1(+)-flag or pcDNA3.1(+)-flag-HIC1 (1  $\mu\text{g}$ ) that contained full-length human HIC1 was transfected into TPC-1 cells grown in 24-well tissue culture plates using Lipofectamine 2000 (Invitrogen, Carlsbad, CA). After 36 h, the cells were collected and the mRNA and protein expression levels of HIC1 or SIRT1 were measured as was as cell proliferation, cell cycle arrest, and senescence.

### Cell proliferation, cell cycle, and apoptosis analyses

TPC-1 cells treated with 5-aza-dC or transfected with an HIC1 expression plasmid were analyzed using a cell cycle detection kit or Annexin V-FITC kit (Beckman Coulter Inc, Fullerton, CA) as previously described [32]. For the proliferation assay, cells were incubated in a CCK8 solution (Beyotime, China) for 0, 24, 48, or 72 h and the  $\text{OD}_{450}$  was recorded according to standard methods.

### Senescence-associated $\beta$ -galactosidase (SA- $\beta$ -gal) assay

SA- $\beta$ -gal activity was measured using a  $\beta$ -Galactosidase staining kit (Beyotime, China) as described previously [33]. TPC-1 cells were washed and fixed for 15 min and incubated overnight at 37°C in the staining solution. Green-stained images were analyzed by confocal laser scanning microscopy.

### Statistical analysis

Statistical analysis was performed using SPSS version 16.0 (SPSS Inc., Chicago, IL). Data are presented

as the means  $\pm$  SEM, unless otherwise indicated. A two-sided  $p$  value  $< 0.05$  was considered statistically significant. Each experiment was performed at least three times.

## ACKNOWLEDGMENTS AND FUNDING

This work was partly supported by grants from the Science and Technology Project of Quanzhou City, a Natural Science Foundation of Fujian province China (2013Z87 and 2014J01409); the Fundamental Research Funds for Medical Science and Technology Innovation Project of Nanjing Military Area Command (2013ZD29); Key Projects of the Fujian Provincial Health System in the Cultivation of Young Talents (2015-ZQN-ZD26); Natural Science Foundation Committee (No. 81302331) and Science and Technology Planning Project of Guangdong Province (2016A020215145).

## CONFLICTS OF INTEREST

The authors declare no competing financial interests.

## REFERENCES

1. Kartal K, Onder S, Kosemehmetoglu K, Kilickap S, Tezel YG, Kaynaroglu V. Methylation status of TSHr in well-differentiated thyroid cancer by using cytologic material. *BMC cancer*. 2015; 15:824.
2. LiVolsi VA. Papillary thyroid carcinoma: an update. *Modern Pathology*. 2011; 24:S1–9.
3. Kulis M, Esteller M. DNA methylation and cancer. *Advances in genetics*. 2010; 70:27–56.
4. Carter MG, Johns MA, Zeng X, Zhou L, Zink MC, Mankowski JL, Donovan DM, Baylin SB. Mice deficient in the candidate tumor suppressor gene Hic1 exhibit developmental defects of structures affected in the Miller-Dieker syndrome. *Human molecular genetics*. 2000; 9:413–419.
5. Morton RA, Jr, Watkins JJ, Bova GS, Wales MM, Baylin SB, Isaacs WB. Hypermethylation of chromosome 17P locus D17S5 in human prostate tissue. *The Journal of urology*. 1996; 156:512–516.
6. Zheng J, Wang J, Sun X, Hao M, Ding T, Xiong D, Wang X, Zhu Y, Xiao G, Cheng G, Zhao M, Zhang J, Wang J. HIC1 modulates prostate cancer progression by epigenetic modification. *Clinical cancer research*. 2013; 19:1400–1410.
7. Kilinc D, Ozdemir O, Ozdemir S, Korgali E, Koksali B, Uslu A, Gultekin YE. Alterations in promoter methylation status of tumor suppressor HIC1, SFRP2, and DAPK1 genes in prostate carcinomas. *DNA and cell biology*. 2012; 31:826–832.
8. Chen YL, Ko CJ, Lin PY, Chuang WL, Hsu CC, Chu PY, Pai MY, Chang CC, Kuo MH, Chu YR, Tung CH,

- Huang TH, Leu YW, et al. Clustered DNA methylation changes in polycomb target genes in early-stage liver cancer. *Biochemical and biophysical research communications*. 2012; 425:290–296.
9. Nishida N, Kudo M, Nagasaka T, Ikai I, Goel A. Characteristic patterns of altered DNA methylation predict emergence of human hepatocellular carcinoma. *Hepatology*. 2012; 56:994–1003.
  10. Zhao G, Qin Q, Zhang J, Liu Y, Deng S, Liu L, Wang B, Tian K, Wang C. Hypermethylation of HIC1 promoter and aberrant expression of HIC1/SIRT1 might contribute to the carcinogenesis of pancreatic cancer. *Annals of surgical oncology*. 2013; 20:S301–311.
  11. Eggers H, Steffens S, Grosshennig A, Becker JU, Hennenlotter J, Stenzl A, Merseburger AS, Kuczyk MA, Serth J. Prognostic and diagnostic relevance of hypermethylated in cancer 1 (HIC1) CpG island methylation in renal cell carcinoma. *International journal of oncology*. 2012; 40:1650–1658.
  12. Parrella P, Scintu M, Prencipe M, Poeta ML, Gallo AP, Rabitti C, Rinaldi M, Tommasi S, Paradiso A, Schittulli F, Valori VM, Toma S, Altomare V, et al. HIC1 promoter methylation and 17p13.3 allelic loss in invasive ductal carcinoma of the breast. *Cancer letters*. 2005; 222:75–81.
  13. Li P, Liu X, Dong ZM, Ling ZQ. Epigenetic silencing of HIC1 promotes epithelial-mesenchymal transition and drives progression in esophageal squamous cell carcinoma. *Oncotarget*. 2015; 6:38151–38165. doi: 10.18632/oncotarget.5832.
  14. Wales MM, Biel MA, el Deiry W, Nelkin BD, Issa JP, Cavenee WK, Kuerbitz SJ, Baylin SB. p53 activates expression of HIC-1, a new candidate tumour suppressor gene on 17p13.3. *Nature medicine*. 1995; 1:570–577.
  15. Rood BR, Zhang H, Weitman DM, Cogen PH. Hypermethylation of HIC-1 and 17p allelic loss in medulloblastoma. *Cancer research*. 2002; 62:3794–3797.
  16. Chen WY, Wang DH, Yen RC, Luo J, Gu W, Baylin SB. Tumor suppressor HIC1 directly regulates SIRT1 to modulate p53-dependent DNA-damage responses. *Cell*. 2005; 123:437–448.
  17. Tseng RC, Lee CC, Hsu HS, Tzao C, Wang YC. Distinct HIC1-SIRT1-p53 loop deregulation in lung squamous carcinoma and adenocarcinoma patients. *Neoplasia*. 2009; 11:763–770.
  18. Frye RA. Characterization of five human cDNAs with homology to the yeast SIR2 gene: Sir2-like proteins (sirtuins) metabolize NAD and may have protein ADP-ribosyltransferase activity. *Biochemical and biophysical research communications*. 1999; 260:273–279.
  19. Ryall JG, Dell’Orso S, Derfoul A, Juan A, Zare H, Feng X, Clermont D, Koulis M, Gutierrez-Cruz G, Fulco M, Sartorelli V. The NAD(+)-dependent SIRT1 deacetylase translates a metabolic switch into regulatory epigenetics in skeletal muscle stem cells. *Cell stem cell*. 2015; 16:171–183.
  20. Brooks CL, Gu W. How does SIRT1 affect metabolism, senescence and cancer? *Nature reviews Cancer*. 2009; 9:123–128.
  21. Zhang Q, Wang SY, Fleuriet C, Leprince D, Rocheleau JV, Piston DW, Goodman RH. Metabolic regulation of SIRT1 transcription via a HIC1:CtBP corepressor complex. *Proceedings of the National Academy of Sciences of the United States of America*. 2007; 104:829–833.
  22. Siraj AK, Hussain AR, Al-Rasheed M, Ahmed M, Bavi P, Alsobhi SA, Al-Nuaim A, Uddin S, Al-Kuraya K. Demethylation of TMS1 gene sensitizes thyroid cancer cells to TRAIL-induced apoptosis. *The Journal of clinical endocrinology and metabolism*. 2011; 96:E215–224.
  23. Bardwell VJ, Treisman R. The POZ domain: a conserved protein-protein interaction motif. *Genes & development*. 1994; 8:1664–1677.
  24. Foveau B, Boulay G, Pinte S, Van Rechem C, Rood BR, Leprince D. The receptor tyrosine kinase EphA2 is a direct target gene of hypermethylated in cancer 1 (HIC1). *The Journal of biological chemistry*. 2012; 287:5366–5378.
  25. Zhang B, Chambers KJ, Leprince D, Faller DV, Wang S. Requirement for chromatin-remodeling complex in novel tumor suppressor HIC1-mediated transcriptional repression and growth control. *Oncogene*. 2009; 28:651–661.
  26. Briones VR, Chen S, Riegel AT, Lechleider RJ. Mechanism of fibroblast growth factor-binding protein 1 repression by TGF-beta. *Biochemical and biophysical research communications*. 2006; 345:595–601.
  27. Boulay G, Malaquin N, Loison I, Foveau B, Van Rechem C, Rood BR, Pourtier A, Leprince D. Loss of Hypermethylated in Cancer 1 (HIC1) in breast cancer cells contributes to stress-induced migration and invasion through beta-2 adrenergic receptor (ADRB2) misregulation. *The Journal of biological chemistry*. 2012; 287:5379–5389.
  28. Brieger J, Pongsapich W, Mann SA, Hedrich J, Fruth K, Pogozelski B, Mann WJ. Demethylation treatment restores hic1 expression and impairs aggressiveness of head and neck squamous cell carcinoma. *Oral oncology*. 2010; 46:678–683.
  29. Elangovan S, Ramachandran S, Venkatesan N, Ananth S, Gnana-Prakasam JP, Martin PM, Browning DD, Schoenlein PV, Prasad PD, Ganapathy V, Thangaraju M. SIRT1 is essential for oncogenic signaling by estrogen/estrogen receptor alpha in breast cancer. *Cancer research*. 2011; 71:6654–6664.
  30. Huffman DM, Grizzle WE, Bamman MM, Kim JS, Eltoum IA, Elgavish A, Nagy TR. SIRT1 is significantly elevated in mouse and human prostate cancer. *Cancer research*. 2007; 67:6612–6618.
  31. Wei XL, Dou XW, Bai JW, Luo XR, Qiu SQ, Xi DD, Huang WH, Du CW, Man K, Zhang GJ. ERalpha inhibits epithelial-mesenchymal transition by suppressing Bmi1 in breast cancer. *Oncotarget*. 2015; 6:21704–21717. doi: 10.18632/oncotarget.3966.

32. Zhang J, Zhang B, Zhang X, Sun Y, Wei X, McNutt MA, Lu S, Liu Y, Zhang D, Wang M, Lin Z, Niu N. SATB1 expression is associated with biologic behavior in colorectal carcinoma *in vitro* and *in vivo*. *PloS one*. 2013; 8:e47902.
33. Zhang D, Sun X, Liu J, Xie X, Cui W, Zhu Y. Homocysteine accelerates senescence of endothelial cells via DNA hypomethylation of human telomerase reverse transcriptase. *Arteriosclerosis, thrombosis, and vascular biology*. 2015; 35:71–78.
